# Supplementary material
Source: Springer Nature journal article supplement (https://www.springermedizin.de/resource/supplementary/12872_2013_706_MOESM3_ESM.pdf/9430726)
Supplement: MOESM3 [file 9430726]

**Total IHD events**  
Aboriginal: 1,072 (19.4%)  
Non-Aboriginal: 4,468

**Total MI events**  
Aboriginal: 375 (19.3%)  
Non-Aboriginal: 1,572

**Exclude 28-day deaths**  
Aboriginal: 13  
Non-Aboriginal: 150

**Exclude 28-day deaths**  
Aboriginal: 10  
Non-Aboriginal: 114

**IHD events**  
Aboriginal: 1,059 (19.7%)  
Non-Aboriginal: 4,318

**MI events only**  
Aboriginal: 365 (20.0%)  
Non-Aboriginal: 1,458

**Metropolitan transfers**  
Aboriginal: 482 (45.5%)  
Non-Aboriginal: 2,040 (47.2%)

**Metropolitan transfers**  
Aboriginal: 278 (76.2%)  
Non-Aboriginal: 1,091 (74.8%)

**Coronary angiography**  
Aboriginal: 393 (81.5%)  
Non-Aboriginal: 1,815 (89.0%)

**Coronary angiography**  
Aboriginal: 239 (86.0%)  
Non-Aboriginal: 1,014 (92.9%)
